# Supplementary material for: Nuclear Receptor Corepressor 1 Expression and Output Declines with Prostate Cancer Progression
Source: Oxford University Press journal article supplement (doi:10.1158/1078-0432.ccr-15-1983), 2016-03-11
Supplement: 10780432ccr151983-sup-154192_2_supp_3348974_828hcw.xlsx [file 10780432ccr151983-sup-154192_2_supp_3348974_828hcw.xlsx]

## Sheet: pathway_results_casodex_ncor_ve
NCOR_CASODEX VS CASODEX						NCOR_VEHICLE vs VEHICLE
Top 50 activated pathways						Top 50 activated pathways
Pathway (4416)	ncor_casodex_casodex(200)	Z	P-value	FDR		Pathway (4416)	vehicle_ncor_vehicle(200)	Z	P-value	FDR
Parkinsons disease (KEGG)(115)	27	9.90116	0	0.25		Focal adhesion (KEGG)(195)	61	18.3744	0	0.25
Oxidative phosphorylation (KEGG)(118)	25	8.81953	0	0.25		Actin Cytoskeleton Signaling (Ingenuity)(209)	63	18.2433	0	0.25
Butanoate metabolism (KEGG)(39)	13	8.68823	0	0.25		Regulation of actin cytoskeleton (KEGG)(206)	61	17.7295	0	0.25
Proteasome (KEGG)(27)	10	8.1474	4.44e-16	0.25		Axonal Guidance Signaling (Ingenuity)(210)	60	17.1665	0	0.25
Valine; leucine and isoleucine degradation (KEGG)(47)	13	7.66609	1.8e-14	0.25		Ubiquitin mediated proteolysis (KEGG)(131)	45	16.6621	0	0.25
Axonal Guidance Signaling (Ingenuity)(210)	32	7.64641	2.09e-14	0.25		Valine; leucine and isoleucine degradation (KEGG)(47)	25	16.128	0	0.25
Aminoacyl-tRNA biosynthesis (KEGG)(40)	11	7.01779	2.27e-12	0.25		ERK/MAPK Signaling (Ingenuity)(149)	46	15.7302	0	0.25
Glutathione metabolism (KEGG)(47)	12	6.96092	3.4e-12	0.25		Wnt signaling pathway (KEGG)(149)	46	15.7302	0	0.25
Urea cycle and metabolism of amino groups (KEGG)(29)	9	6.88621	5.76e-12	0.25		MAPK signaling pathway (KEGG)(260)	61	15.1317	0	0.25
Renal cell carcinoma (KEGG)(70)	15	6.85345	7.25e-12	0.25		Fatty acid metabolism (KEGG)(46)	23	14.9074	0	0.25
Phenylalanine metabolism (KEGG)(19)	7	6.78745	1.15e-11	0.25		Long-term potentiation (KEGG)(71)	29	14.8341	0	0.25
Actin Cytoskeleton Signaling (Ingenuity)(209)	29	6.65687	2.81e-11	0.25		wnt Signaling (Ingenuity)(77)	30	14.6569	0	0.25
Fatty acid elongation in mitochondria (KEGG)(11)	5	6.53502	6.39e-11	0.25		Non-small cell lung cancer (KEGG)(54)	24	14.1914	0	0.25
ERK/MAPK Signaling (Ingenuity)(149)	23	6.51293	7.41e-11	0.25		Integrin Signaling (Ingenuity)(97)	33	14.1228	0	0.25
Selenoamino acid metabolism (KEGG)(26)	8	6.45285	1.1e-10	0.25		Insulin signaling pathway (KEGG)(134)	39	13.8919	0	0.25
Cell cycle (KEGG)(105)	18	6.29047	3.18e-10	0.25		Renal cell carcinoma (KEGG)(70)	27	13.8056	0	0.25
Methionine metabolism (KEGG)(22)	7	6.17023	6.85e-10	0.25		Synaptic Long Term Depression (Ingenuity)(107)	34	13.7198	0	0.25
Prostate cancer (KEGG)(90)	16	6.10637	1.02e-09	0.25		Adherens junction (KEGG)(76)	28	13.6638	0	0.25
Tryptophan metabolism (KEGG)(50)	11	5.97435	2.32e-09	0.25		Pathogenic Escherichia coli infection - EHEC (KEGG)(50)	22	13.4974	0	0.25
Small cell lung cancer (KEGG)(86)	15	5.8151	6.08e-09	0.25		Lysine degradation (KEGG)(50)	22	13.4974	0	0.25
Focal adhesion (KEGG)(195)	25	5.69473	1.24e-08	0.25		Pathogenic Escherichia coli infection - EPEC (KEGG)(50)	22	13.4974	0	0.25
Axon guidance (KEGG)(129)	19	5.65372	1.57e-08	0.25		Cell cycle (KEGG)(105)	33	13.4147	0	0.25
Fatty acid metabolism (KEGG)(46)	10	5.64224	1.68e-08	0.25		Axon guidance (KEGG)(129)	37	13.3882	0	0.25
mTOR signaling pathway (KEGG)(47)	10	5.5506	2.85e-08	0.25		Chronic myeloid leukemia (KEGG)(74)	27	13.3313	0	0.25
Pancreatic cancer (KEGG)(73)	13	5.50134	3.78e-08	0.25		Butanoate metabolism (KEGG)(39)	19	13.3287	0	0.25
Synthesis and degradation of ketone bodies (KEGG)(10)	4	5.39983	6.69e-08	0.25		Prostate cancer (KEGG)(90)	30	13.2759	0	0.25
Phenylalanine; tyrosine and tryptophan biosynthesis (KEGG)(10)	4	5.39983	6.69e-08	0.25		Small cell lung cancer (KEGG)(86)	29	13.1461	0	0.25
Folate biosynthesis (KEGG)(34)	8	5.34805	8.91e-08	0.25		Acute myeloid leukemia (KEGG)(57)	23	13.0895	0	0.25
Colorectal cancer (KEGG)(85)	14	5.34573	9.02e-08	0.25		Endometrial cancer (KEGG)(53)	22	13.0241	0	0.25
Tight junction (KEGG)(127)	18	5.30299	1.14e-07	0.25		Glioma (KEGG)(63)	24	12.9035	0	0.25
Lysine degradation (KEGG)(50)	10	5.29043	1.22e-07	0.25		Tryptophan metabolism (KEGG)(50)	21	12.8135	0	0.25
Alanine and aspartate metabolism (KEGG)(28)	7	5.22534	1.74e-07	0.25		ErbB signaling pathway (KEGG)(85)	28	12.7189	0	0.25
Glycine; serine and threonine metabolism (KEGG)(43)	9	5.19697	2.03e-07	0.25		sapk-jnk Signaling (Ingenuity)(102)	31	12.7078	0	0.25
Antigen processing and presentation (KEGG)(80)	13	5.08739	3.64e-07	0.25		Natural killer cell mediated cytotoxicity (KEGG)(127)	35	12.6633	0	0.25
Purine metabolism (KEGG)(146)	19	5.01336	5.36e-07	0.25		Bladder cancer (KEGG)(43)	19	12.5659	0	0.25
Long-term depression (KEGG)(72)	12	4.99328	5.95e-07	0.25		VEGF signaling pathway (KEGG)(71)	25	12.5329	0	0.25
Non-small cell lung cancer (KEGG)(54)	10	4.97378	6.58e-07	0.25		T cell receptor signaling pathway (KEGG)(93)	29	12.4922	0	0.25
Limonene and pinene degradation (KEGG)(17)	5	4.94283	7.71e-07	0.25		pi3k-akt Signaling (Ingenuity)(157)	39	12.4616	0	0.25
TGF-Beta Signaling (Ingenuity)(83)	13	4.92393	8.49e-07	0.25		Long-term depression (KEGG)(72)	25	12.4211	0	0.25
Fructose and mannose metabolism (KEGG)(38)	8	4.91914	8.71e-07	0.25		Cell Communication (KEGG)(132)	35	12.3322	0	0.25
Insulin Recpetor Signaling (Ingenuity)(64)	11	4.90521	9.35e-07	0.25		Melanogenesis (KEGG)(101)	30	12.307	0	0.25
Terpenoid biosynthesis (KEGG)(7)	3	4.88007	1.06e-06	0.25		p53 Signaling (Ingenuity)(49)	20	12.2826	0	0.25
Glutamate metabolism (KEGG)(31)	7	4.85001	1.24e-06	0.25		Tight junction (KEGG)(127)	34	12.2304	0	0.25
Aminosugars metabolism (KEGG)(31)	7	4.85001	1.24e-06	0.25		Colorectal cancer (KEGG)(85)	27	12.1922	0	0.25
Synaptic Long Term Depression (Ingenuity)(107)	15	4.77843	1.77e-06	0.25		JAK/Stat Signaling (Ingenuity)(141)	36	12.1885	0	0.25
p53 signaling pathway (KEGG)(66)	11	4.77741	1.78e-06	0.25		GM-CSF Signaling (Ingenuity)(41)	18	12.1797	0	0.25
Biosynthesis of steroids (KEGG)(25)	6	4.69468	2.67e-06	0.25		Glycan structures - biosynthesis 1 (KEGG)(116)	32	12.1013	0	0.25
Regulation of actin cytoskeleton (KEGG)(206)	23	4.69064	2.73e-06	0.25		Gap junction (KEGG)(92)	28	12.0747	0	0.25
Huntingtons disease (KEGG)(33)	7	4.62571	3.74e-06	0.25		IL-2 Signaling (Ingenuity)(38)	17	11.97	0	0.25
Benzoate degradation via CoA ligation (KEGG)(13)	4	4.55611	5.22e-06	0.25		TGF-Beta Signaling (Ingenuity)(83)	26	11.8508	0	0.25
Top 50 suppressed pathways						Top 50 suppressed pathways
Pathway (4416)	ncor_casodex_casodex(200)	Z	P-value	FDR		Pathway (4416)	vehicle_ncor_vehicle(200)	Z	P-value	FDR
Maturity onset diabetes of the young (KEGG)(23)	0	-1.04716	0.295025	1		Taurine and hypotaurine metabolism (KEGG)(11)	0	-0.723192	0.469562	1
ppar Signaling (Ingenuity)(54)	1	-0.951816	0.34119	1		Peptidoglycan biosynthesis (KEGG)(6)	0	-0.53381	0.593473	1
IL10 Signaling (Ingenuity)(53)	1	-0.930548	0.352087	1		D-Glutamine and D-glutamate metabolism (KEGG)(5)	0	-0.487244	0.626085	1
Olfactory transduction (KEGG)(110)	3	-0.920183	0.357477	1		Monoterpenoid biosynthesis (KEGG)(3)	0	-0.377332	0.705927	1
Neuroactive ligand-receptor interaction (KEGG)(239)	8	-0.903244	0.366396	1		1;4-Dichlorobenzene degradation (KEGG)(2)	0	-0.308055	0.75804	1
Keratan sulfate biosynthesis (KEGG)(17)	0	-0.899658	0.368302	1		Fluorobenzoate degradation (KEGG)(2)	0	-0.308055	0.75804	1
NFkB Signaling (Ingenuity)(14)	0	-0.816148	0.414415	1		D-Arginine and D-ornithine metabolism (KEGG)(2)	0	-0.308055	0.75804	1
C21-Steroid hormone metabolism (KEGG)(12)	0	-0.755435	0.449988	1		Nucleotide Metabolism (Wiki)(1)	0	-0.217803	0.827582	1
Glycosphingolipid biosynthesis - lactoseries (KEGG)(11)	0	-0.723192	0.469562	1		Circadian (Wiki)(1)	0	-0.217803	0.827582	1
1- and 2-Methylnaphthalene degradation (KEGG)(11)	0	-0.723192	0.469562	1		Oxidative Stress (Wiki)(1)	0	-0.217803	0.827582	1
Ubiquinone biosynthesis (KEGG)(8)	0	-0.61653	0.537545	1		Eukaryotic Transcription Initiation (Wiki)(1)	0	-0.217803	0.827582	1
Caffeine metabolism (KEGG)(8)	0	-0.61653	0.537545	1		Wnt Signaling Pathway (Wiki)(1)	0	-0.217803	0.827582	1
Fatty acid biosynthesis (KEGG)(7)	0	-0.576646	0.564179	1		cytochrome P450 (Wiki)(1)	0	-0.217803	0.827582	1
Peptidoglycan biosynthesis (KEGG)(6)	0	-0.53381	0.593473	1		Statin Pathway PharmGKB (Wiki)(1)	0	-0.217803	0.827582	1
Styrene degradation (KEGG)(4)	0	-0.435755	0.663015	1		Hedgehog - Tutorial - Jesse Paquette (Wiki)(1)	0	-0.217803	0.827582	1
Inositol metabolism (KEGG)(3)	0	-0.377332	0.705927	1		mRNA processing (Wiki)(1)	0	-0.217803	0.827582	1
1;4-Dichlorobenzene degradation (KEGG)(2)	0	-0.308055	0.75804	1		tewst (Wiki)(1)	0	-0.217803	0.827582	1
D-Arginine and D-ornithine metabolism (KEGG)(2)	0	-0.308055	0.75804	1		MAPK Cascade (Wiki)(1)	0	-0.217803	0.827582	1
Fluorobenzoate degradation (KEGG)(2)	0	-0.308055	0.75804	1		TGF-beta Receptor Signaling Pathway (Wiki)(1)	0	-0.217803	0.827582	1
Asthma (KEGG)(28)	1	-0.244422	0.806904	1		IL-6 Signaling Pathway (Wiki)(1)	0	-0.217803	0.827582	1
Electron Transport Chain (Wiki)(1)	0	-0.217803	0.827582	1		MAPK signaling pathway (Wiki)(1)	0	-0.217803	0.827582	1
Pentose Phosphate Pathway (Wiki)(1)	0	-0.217803	0.827582	1		Mitochondrial LC-Fatty Acid Beta-Oxidation (Wiki)(1)	0	-0.217803	0.827582	1
Androgen Receptor Signaling Pathway (Wiki)(1)	0	-0.217803	0.827582	1		G Protein Signaling Pathways (Wiki)(1)	0	-0.217803	0.827582	1
Phase I; non P450 (Wiki)(1)	0	-0.217803	0.827582	1		Ovarian Infertility Genes (Wiki)(1)	0	-0.217803	0.827582	1
GPCRs; Other (Wiki)(1)	0	-0.217803	0.827582	1		Wnt Signaling Pathway NetPath (Wiki)(1)	0	-0.217803	0.827582	1
Endocannabinoids (Wiki)(1)	0	-0.217803	0.827582	1		Fatty Acid Biosynthesis (Wiki)(1)	0	-0.217803	0.827582	1
Osteoclast (Wiki)(1)	0	-0.217803	0.827582	1		B Cell Receptor Signaling (Ingenuity)(1)	0	-0.217803	0.827582	1
IL-5 Signaling Pathway (Wiki)(1)	0	-0.217803	0.827582	1		Wnt Signaling Pathway and Pluripotency (Wiki)(1)	0	-0.217803	0.827582	1
Matrix Metalloproteinases (Wiki)(1)	0	-0.217803	0.827582	1		p38 MAPK Signaling Pathway (BioCarta) (Wiki)(1)	0	-0.217803	0.827582	1
Homologous recombination (Wiki)(1)	0	-0.217803	0.827582	1		Sandbox Pathway (Wiki)(1)	0	-0.217803	0.827582	1
Integrin-mediated cell adhesion (Wiki)(1)	0	-0.217803	0.827582	1		Apoptosis Modulation by HSP70 (Wiki)(1)	0	-0.217803	0.827582	1
Proteasome Degradation (Wiki)(1)	0	-0.217803	0.827582	1		Striated Muscle Contraction (Wiki)(1)	0	-0.217803	0.827582	1
IL-1 Signaling Pathway (Wiki)(1)	0	-0.217803	0.827582	1		IL-4 signaling Pathway (Wiki)(1)	0	-0.217803	0.827582	1
Fatty Acid Omega Oxidation (Wiki)(1)	0	-0.217803	0.827582	1		Mitochondrial Gene Expression (Wiki)(1)	0	-0.217803	0.827582	1
IL-7 Signaling Pathway (Wiki)(1)	0	-0.217803	0.827582	1		TLR Receptor (Wiki)(1)	0	-0.217803	0.827582	1
Cholesterol Biosynthesis (Wiki)(1)	0	-0.217803	0.827582	1		G13 Signaling Pathway (Wiki)(1)	0	-0.217803	0.827582	1
Eicosanoid Synthesis (Wiki)(1)	0	-0.217803	0.827582	1		Id Signaling Pathway (Wiki)(1)	0	-0.217803	0.827582	1
selenium (Wiki)(1)	0	-0.217803	0.827582	1		Acetylcholine Synthesis (Wiki)(1)	0	-0.217803	0.827582	1
Fatty Acid Beta Oxidation (Wiki)(1)	0	-0.217803	0.827582	1		Hypertrophy Model (Wiki)(1)	0	-0.217803	0.827582	1
Nuclear Receptors (Wiki)(1)	0	-0.217803	0.827582	1		Regulation of Actin Cytoskeleton (Wiki)(1)	0	-0.217803	0.827582	1
Cell cycle (Wiki)(1)	0	-0.217803	0.827582	1		AZ conjugatie (Wiki)(1)	0	-0.217803	0.827582	1
TestingWatch (Wiki)(1)	0	-0.217803	0.827582	1		Signaling of Hepatocyte Growth Factor Receptor (Wiki)(1)	0	-0.217803	0.827582	1
Folic Acid Network (Wiki)(1)	0	-0.217803	0.827582	1		Biogenic Amine Synthesis (Wiki)(1)	0	-0.217803	0.827582	1
GPCRs; Class C Metabotropic glutamate; pheromone (Wiki)(1)	0	-0.217803	0.827582	1		Complement Activation; Classical Pathway (Wiki)(1)	0	-0.217803	0.827582	1
Non-homologous end joining (Wiki)(1)	0	-0.217803	0.827582	1		Complement and Coagulation Cascades KEGG (Wiki)(1)	0	-0.217803	0.827582	1
Regulation of Actin Cytoskeleton (Wiki)(1)	0	-0.217803	0.827582	1		ACE Inhibitor Pathway (Wiki)(1)	0	-0.217803	0.827582	1
Glycogen Metabolism (Wiki)(1)	0	-0.217803	0.827582	1		Mismatch repair (Wiki)(1)	0	-0.217803	0.827582	1
IL-2 Signaling Pathway (Wiki)(1)	0	-0.217803	0.827582	1		Cytokines and Inflammatory Response (BioCarta) (Wiki)(1)	0	-0.217803	0.827582	1
Steroid Biosynthesis (Wiki)(1)	0	-0.217803	0.827582	1		Calcium Regulation in the Cardiac Cell (Wiki)(1)	0	-0.217803	0.827582	1
Urea cycle and metabolism of amino groups (Wiki)(1)	0	-0.217803	0.827582	1		Glycolysis and Gluconeogenesis (Wiki)(1)	0	-0.217803	0.827582	1
