# Supplementary material for: Nuclear Receptor Corepressor 1 Expression and Output Declines with Prostate Cancer Progression
Source: Oxford University Press journal article supplement (doi:10.1158/1078-0432.ccr-15-1983), 2016-03-11
Supplement: 10780432ccr151983-sup-154192_2_supp_3348975_w2whcx.xlsx [file 10780432ccr151983-sup-154192_2_supp_3348975_w2whcx.xlsx]

## Sheet: 24h_pathway_results_topN_only
24 hours						48 hours
Top 50 activated pathways						Top 50 activated pathways
Pathway (3931)	24h(200)	Z	P-value	FDR		Pathway (3931)	48h(200)	Z	P-value	FDR
DNA replication (KEGG)(35)	20	14.0754	0	0.25		DNA replication (KEGG)(35)	16	10.9851	0	0.25
Cell cycle (KEGG)(97)	26	9.85414	0	0.25		Cell cycle (KEGG)(97)	25	9.38634	0	0.25
Base excision repair (KEGG)(32)	9	5.95388	2.62759e-09	0.25		Pentose and glucuronate interconversions (KEGG)(13)	4	4.22018	2.44e-05	0.25
Nucleotide excision repair (KEGG)(41)	10	5.6533	1.57836e-08	0.25		Pyrimidine metabolism (KEGG)(72)	11	3.97078	7.17e-05	0.25
Pyrimidine metabolism (KEGG)(72)	13	5.0532	4.3519e-07	0.25		Drug metabolism - other enzymes (KEGG)(37)	6	3.09463	0.00197069	0.25
p53 Signaling (Ingenuity)(46)	9	4.49415	6.99132e-06	0.25		Systemic lupus erythematosus (KEGG)(104)	12	3.03365	0.00241626	0.25
Cell Cycle: G1/S Check point Regulation (Ingenuity)(32)	7	4.3386	1.43503e-05	0.25		Nucleotide excision repair (KEGG)(41)	6	2.79594	0.00517504	1
p53 signaling pathway (KEGG)(61)	10	4.04928	5.14014e-05	0.25		Glutathione metabolism (KEGG)(41)	6	2.79594	0.00517504	1
Biosynthesis of steroids (KEGG)(24)	5	3.52058	0.000430693	0.25		Starch and sucrose metabolism (KEGG)(32)	5	2.72331	0.00646328	1
Purine metabolism (KEGG)(127)	15	3.50456	0.000457455	0.25		One carbon pool by folate (KEGG)(15)	3	2.63293	0.00846534	1
Bladder cancer (KEGG)(43)	7	3.35756	0.000786451	0.25		p53 signaling pathway (KEGG)(61)	7	2.28782	0.0221479	1
Small cell lung cancer (KEGG)(86)	11	3.28646	0.00101466	0.25		Ether lipid metabolism (KEGG)(28)	4	2.2225	0.0262492	1
Cell Cycle-G2M DNA Damage Checkpoint Regulation (Ingenuity)(14)	3	2.78697	0.00532044	0.25		Glyoxylate and dicarboxylate metabolism (KEGG)(12)	2	1.82786	0.067571	1
Prostate cancer (KEGG)(88)	10	2.70927	0.00674329	0.25		Ubiquitin mediated proteolysis (KEGG)(116)	10	1.75747	0.0788376	1
One carbon pool by folate (KEGG)(15)	3	2.63293	0.00846534	0.25		Biosynthesis of steroids (KEGG)(24)	3	1.65731	0.0974559	1
Urea cycle and metabolism of amino groups (KEGG)(25)	4	2.49052	0.0127558	1		Pathogenic Escherichia coli infection - EPEC (KEGG)(50)	5	1.59061	0.111697	1
Acute myeloid leukemia (KEGG)(57)	7	2.48906	0.0128081	1		Pathogenic Escherichia coli infection - EHEC (KEGG)(50)	5	1.59061	0.111697	1
Synthesis and degradation of ketone bodies (KEGG)(10)	2	2.1484	0.0316815	1		Urea cycle and metabolism of amino groups (KEGG)(25)	3	1.57759	0.11466	1
Phenylalanine metabolism (KEGG)(19)	3	2.12766	0.0333652	1		Cell Cycle-G2M DNA Damage Checkpoint Regulation (Ingenuity)(14)	2	1.56874	0.116709	1
Glutathione metabolism (KEGG)(41)	5	2.0816	0.037379	1		Riboflavin metabolism (KEGG)(14)	2	1.56874	0.116709	1
O-Glycan biosynthesis (KEGG)(20)	3	2.02215	0.0431602	1		Porphyrin and chlorophyll metabolism (KEGG)(26)	3	1.5016	0.1332	1
Biosynthesis of unsaturated fatty acids (KEGG)(20)	3	2.02215	0.0431602	1		alpha-Linolenic acid metabolism (KEGG)(15)	2	1.45585	0.145434	1
Arginine and proline metabolism (KEGG)(31)	4	1.98781	0.0468326	1		Glycerophospholipid metabolism (KEGG)(56)	5	1.3172	0.187771	1
Melanoma (KEGG)(69)	7	1.9284	0.0538053	1		Small cell lung cancer (KEGG)(86)	7	1.30204	0.192902	1
Glyoxylate and dicarboxylate metabolism (KEGG)(12)	2	1.82786	0.067571	1		Histidine metabolism (KEGG)(29)	3	1.29292	0.19604	1
Endoplasmic Reticulum Stress Pathway (Ingenuity)(12)	2	1.82786	0.067571	1		Alkaloid biosynthesis I (KEGG)(6)	1	1.2915	0.19653	1
Peptidoglycan biosynthesis (KEGG)(4)	1	1.81297	0.0698359	1		Glycerolipid metabolism (KEGG)(43)	4	1.26443	0.206075	1
Chronic myeloid leukemia (KEGG)(72)	7	1.80592	0.0709301	1		Heparan sulfate biosynthesis (KEGG)(17)	2	1.25535	0.209353	1
Glioma (KEGG)(60)	6	1.74468	0.0810411	1		Propanoate metabolism (KEGG)(31)	3	1.16735	0.24307	1
Pentose and glucuronate interconversions (KEGG)(13)	2	1.69206	0.0906346	1		Folate biosynthesis (KEGG)(31)	3	1.16735	0.24307	1
Glycosphingolipid biosynthesis - globoseries (KEGG)(14)	2	1.56874	0.116709	1		Sphingolipid metabolism (KEGG)(31)	3	1.16735	0.24307	1
Biotin metabolism (KEGG)(5)	1	1.51818	0.128968	1		Valine; leucine and isoleucine degradation (KEGG)(45)	4	1.16691	0.243245	1
D-Glutamine and D-glutamate metabolism (KEGG)(5)	1	1.51818	0.128968	1		p53 Signaling (Ingenuity)(46)	4	1.11997	0.262725	1
Glycosphingolipid biosynthesis - ganglioseries (KEGG)(15)	2	1.45585	0.145434	1		Nucleotide sugars metabolism (KEGG)(7)	1	1.10827	0.267743	1
Non-small cell lung cancer (KEGG)(53)	5	1.44949	0.147201	1		Cell Cycle: G1/S Check point Regulation (Ingenuity)(32)	3	1.10802	0.267853	1
Glutamate metabolism (KEGG)(27)	3	1.42901	0.153	1		Base excision repair (KEGG)(32)	3	1.10802	0.267853	1
Glycan structures - biosynthesis 2 (KEGG)(54)	5	1.40447	0.160179	1		Biosynthesis of unsaturated fatty acids (KEGG)(20)	2	1.00213	0.316283	1
Histidine metabolism (KEGG)(29)	3	1.29292	0.19604	1		Methionine metabolism (KEGG)(20)	2	1.00213	0.316283	1
Terpenoid biosynthesis (KEGG)(6)	1	1.2915	0.19653	1		Thiamine metabolism (KEGG)(8)	1	0.954898	0.339629	1
Pancreatic cancer (KEGG)(72)	6	1.26471	0.205975	1		Androgen and estrogen metabolism (KEGG)(35)	3	0.94196	0.346213	1
Thyroid cancer (KEGG)(30)	3	1.22892	0.219102	1		TGF-beta signaling pathway (KEGG)(82)	6	0.928271	0.353267	1
Fatty acid metabolism (KEGG)(44)	4	1.21504	0.224349	1		Metabolism of xenobiotics by cytochrome P450 (KEGG)(51)	4	0.9012	0.367482	1
Propanoate metabolism (KEGG)(31)	3	1.16735	0.24307	1		Colorectal cancer (KEGG)(83)	6	0.8971	0.369666	1
Valine; leucine and isoleucine degradation (KEGG)(45)	4	1.16691	0.243245	1		Pyruvate metabolism (KEGG)(37)	3	0.839907	0.400961	1
Lysine degradation (KEGG)(46)	4	1.11997	0.262725	1		Butanoate metabolism (KEGG)(37)	3	0.839907	0.400961	1
ErbB signaling pathway (KEGG)(81)	6	0.959854	0.337129	1		Atrazine degradation (KEGG)(9)	1	0.823146	0.410425	1
Methane metabolism (KEGG)(8)	1	0.954898	0.339629	1		Ascorbate and aldarate metabolism (KEGG)(9)	1	0.823146	0.410425	1
Primary immunodeficiency (KEGG)(35)	3	0.94196	0.346213	1		Reductive carboxylate cycle (CO2 fixation) (KEGG)(9)	1	0.823146	0.410425	1
TGF-Beta Signaling (Ingenuity)(82)	6	0.928271	0.353267	1		Melanoma (KEGG)(69)	5	0.823123	0.410438	1
RNA polymerase (KEGG)(21)	2	0.927447	0.353695	1		Drug metabolism - cytochrome P450 (KEGG)(55)	4	0.742515	0.457775	1
Top 50 suppressed pathways						Top 50 suppressed pathways
Pathway (3931)	24h(200)	Z	P-value	FDR		Pathway (3931)	48h(200)	Z	P-value	FDR
Calcium signaling pathway (KEGG)(164)	2	-2.30256	0.0213037	1		Cytokine-cytokine receptor interaction (KEGG)(233)	3	-2.72128	0.006503	1
Wnt signaling pathway (KEGG)(134)	2	-1.92677	0.0540081	1		Oxidative phosphorylation (KEGG)(100)	0	-2.345	0.0190271	1
Ribosome (KEGG)(67)	0	-1.91125	0.0559723	1		Neuroactive ligand-receptor interaction (KEGG)(219)	5	-1.94343	0.0519636	1
Complement and coagulation cascades (KEGG)(67)	0	-1.91125	0.0559723	1		Ribosome (KEGG)(67)	0	-1.91125	0.0559723	1
Olfactory transduction (KEGG)(66)	0	-1.89669	0.057869	1		Olfactory transduction (KEGG)(66)	0	-1.89669	0.057869	1
Parkinsons disease (KEGG)(100)	1	-1.88409	0.0595528	1		Parkinsons disease (KEGG)(100)	1	-1.88409	0.0595528	1
Amyotrophic lateral sclerosis (ALS) (KEGG)(51)	0	-1.66406	0.0961012	1		Adipocytokine signaling pathway (KEGG)(63)	0	-1.85236	0.0639738	1
Calcium Signaling (Ingenuity)(48)	0	-1.61375	0.106582	1		Epithelial cell signaling in Helicobacter pylori infection (KEGG)(61)	0	-1.82225	0.0684169	1
Hedgehog signaling pathway (KEGG)(46)	0	-1.57936	0.114253	1		Toll-like receptor signaling pathway (KEGG)(94)	1	-1.79676	0.0723733	1
Basal cell carcinoma (KEGG)(46)	0	-1.57936	0.114253	1		Hematopoietic cell lineage (KEGG)(86)	1	-1.67459	0.0940139	1
p38 MAPK Signaling (Ingenuity)(45)	0	-1.5619	0.118311	1		Amyotrophic lateral sclerosis (ALS) (KEGG)(51)	0	-1.66406	0.0961012	1
Death Receptor Signaling (Ingenuity)(41)	0	-1.4901	0.136198	1		Calcium Signaling (Ingenuity)(48)	0	-1.61375	0.106582	1
cAMP-mediated Signaling (Ingenuity)(74)	1	-1.47645	0.139824	1		Hedgehog signaling pathway (KEGG)(46)	0	-1.57936	0.114253	1
Adherens junction (KEGG)(74)	1	-1.47645	0.139824	1		Focal adhesion (KEGG)(189)	5	-1.56582	0.11739	1
Notch signaling pathway (KEGG)(38)	0	-1.434	0.151573	1		Adherens junction (KEGG)(74)	1	-1.47645	0.139824	1
wnt Signaling (Ingenuity)(71)	1	-1.42355	0.154576	1		cAMP-mediated Signaling (Ingenuity)(74)	1	-1.47645	0.139824	1
Oxidative phosphorylation (KEGG)(100)	2	-1.42318	0.154684	1		Neurotrophin/TRK Signaling (Ingenuity)(39)	0	-1.45293	0.146243	1
Amyloid Processing (Ingenuity)(36)	0	-1.39539	0.162898	1		Acute Phase Response Signaling (Ingenuity)(100)	2	-1.42318	0.154684	1
SNARE interactions in vesicular transport (KEGG)(33)	0	-1.33547	0.181722	1		Chemokine Signaling (Ingenuity)(36)	0	-1.39539	0.162898	1
MAPK signaling pathway (KEGG)(243)	8	-1.31488	0.188552	1		VEGF Signaling (Ingenuity)(69)	1	-1.38743	0.165311	1
Neuroactive ligand-receptor interaction (KEGG)(219)	7	-1.31062	0.189986	1		Primary immunodeficiency (KEGG)(35)	0	-1.3757	0.168915	1
Folate biosynthesis (KEGG)(31)	0	-1.29404	0.195652	1		Taste transduction (KEGG)(35)	0	-1.3757	0.168915	1
Regulation of autophagy (KEGG)(31)	0	-1.29404	0.195652	1		Long-term potentiation (KEGG)(68)	1	-1.36909	0.17097	1
Adipocytokine signaling pathway (KEGG)(63)	1	-1.27445	0.202503	1		SNARE interactions in vesicular transport (KEGG)(33)	0	-1.33547	0.181722	1
Alzheimers disease (KEGG)(28)	0	-1.22936	0.218938	1		IL6 Signaling (Ingenuity)(65)	1	-1.31293	0.189208	1
Glycan structures - degradation (KEGG)(27)	0	-1.20705	0.227413	1		Natural killer cell mediated cytotoxicity (KEGG)(120)	3	-1.30999	0.1902	1
Galactose metabolism (KEGG)(26)	0	-1.18434	0.23628	1		GnRH signaling pathway (KEGG)(92)	2	-1.28684	0.198151	1
Proteasome (KEGG)(26)	0	-1.18434	0.23628	1		Integrin Signaling (Ingenuity)(91)	2	-1.26917	0.204382	1
Hematopoietic cell lineage (KEGG)(86)	2	-1.17849	0.238602	1		B cell receptor signaling pathway (KEGG)(62)	1	-1.25489	0.209519	1
Alanine and aspartate metabolism (KEGG)(23)	0	-1.11349	0.265499	1		T cell receptor signaling pathway (KEGG)(90)	2	-1.25135	0.210808	1
Selenoamino acid metabolism (KEGG)(22)	0	-1.08887	0.27621	1		Asthma (KEGG)(28)	0	-1.22936	0.218938	1
Maturity onset diabetes of the young (KEGG)(22)	0	-1.08887	0.27621	1		Tight junction (KEGG)(115)	3	-1.22774	0.219546	1
Antigen processing and presentation (KEGG)(80)	2	-1.06403	0.287314	1		Calcium signaling pathway (KEGG)(164)	5	-1.21369	0.224864	1
Interferon Signaling (Ingenuity)(21)	0	-1.0637	0.287464	1		t cell receptor Signaling (Ingenuity)(59)	1	-1.1948	0.232166	1
PPAR-alpha/RXR-alpha Signaling (Ingenuity)(104)	3	-1.0361	0.300154	1		Proteasome (KEGG)(26)	0	-1.18434	0.23628	1
Leukocyte transendothelial migration (KEGG)(103)	3	-1.01787	0.30874	1		Pentose phosphate pathway (KEGG)(26)	0	-1.18434	0.23628	1
IL10 Signaling (Ingenuity)(50)	1	-0.999836	0.31739	1		PTEN Signaling (Ingenuity)(58)	1	-1.17427	0.240285	1
Arachidonic acid metabolism (KEGG)(50)	1	-0.999836	0.31739	1		Apoptosis (KEGG)(85)	2	-1.15986	0.246106	1
IL-4 Signaling (Ingenuity)(18)	0	-0.984419	0.32491	1		ECM-receptor interaction (KEGG)(83)	2	-1.12208	0.261828	1
Glycosaminoglycan degradation (KEGG)(18)	0	-0.984419	0.32491	1		Vibrio cholerae infection (KEGG)(55)	1	-1.1111	0.266525	1
Autoimmune thyroid disease (KEGG)(49)	1	-0.976578	0.328778	1		Glycan structures - biosynthesis 2 (KEGG)(54)	1	-1.08948	0.275944	1
Acute Phase Response Signaling (Ingenuity)(100)	3	-0.96227	0.335914	1		Selenoamino acid metabolism (KEGG)(22)	0	-1.08887	0.27621	1
gamma-Hexachlorocyclohexane degradation (KEGG)(17)	0	-0.956561	0.338789	1		Maturity onset diabetes of the young (KEGG)(22)	0	-1.08887	0.27621	1
Renin-angiotensin system (KEGG)(17)	0	-0.956561	0.338789	1		EGF Signaling (Ingenuity)(22)	0	-1.08887	0.27621	1
Heparan sulfate biosynthesis (KEGG)(17)	0	-0.956561	0.338789	1		Antigen processing and presentation (KEGG)(80)	2	-1.06403	0.287314	1
Regulation of actin cytoskeleton (KEGG)(193)	7	-0.946951	0.343664	1		Interferon Signaling (Ingenuity)(21)	0	-1.0637	0.287464	1
Nicotinate and nicotinamide metabolism (KEGG)(16)	0	-0.927882	0.353469	1		RNA polymerase (KEGG)(21)	0	-1.0637	0.287464	1
Chondroitin sulfate biosynthesis (KEGG)(16)	0	-0.927882	0.353469	1		ppar Signaling (Ingenuity)(52)	1	-1.04531	0.295881	1
Dentatorubropallidoluysian atrophy (DRPLA) (KEGG)(16)	0	-0.927882	0.353469	1		IGF-1 Signaling (Ingenuity)(52)	1	-1.04531	0.295881	1
FGF Signaling (Ingenuity)(72)	2	-0.90014	0.368046	1		PPAR-alpha/RXR-alpha Signaling (Ingenuity)(104)	3	-1.0361	0.300154	1
