# Supplementary material for: Nuclear Receptor Corepressor 1 Expression and Output Declines with Prostate Cancer Progression
Source: Oxford University Press journal article supplement (doi:10.1158/1078-0432.ccr-15-1983), 2016-03-11
Supplement: 10780432ccr151983-sup-154192_2_supp_3348976_r2rhcx.xlsx [file 10780432ccr151983-sup-154192_2_supp_3348976_r2rhcx.xlsx]

## Sheet: Sheet1
ABHD2
ACACA
ADRB2
AK3L1
ALDH1A3
ASF1B
ATAD2
AZGP1
BBS4
BIRC5
BTG3
CCDC86
CCNA2
CDC25A
CDCA4
CENPN
CHAF1A
CREB3L2
CTPS
DBI
DEGS1
DHCR24
EAF2
EIF4EBP1
ENDOD1
EXPH5
FEN1
FLNB
GINS2
GLRX2
GPD1L
GTF3A
KCNMA1
KCNN2
KDELR2
KLK2
KLK3
LAMA3
MALT1
MAOA
MCM3
MCM4
MCM6
MCM7
METTL3
MLF1IP
MNS1
MPHOSPH9
MYCBP2
NASP
NCAPG
NKX3-1
ORC5L
OSBPL8
PAK1IP1
PARP2
PCNXL2
PDIA5
PDSS1
PEX10
PLK4
POLE3
PPAP2A
PPIF
PRIM1
PRPS1
PYCRL
RAB32
RAB3B
RFC3
RFC5
RNASEH2A
RNF138
SAC3D1
SGEF
SLC4A4
TAOK3
TBC1D1
TFPI
TMEM97
TXNDC5
UAP1
ZBTB16
ZWILCH
ZWINT
