# Supplementary material for: Nuclear Receptor Corepressor 1 Expression and Output Declines with Prostate Cancer Progression
Source: Oxford University Press journal article supplement (doi:10.1158/1078-0432.ccr-15-1983), 2016-03-11
Supplement: 10780432ccr151983-sup-154192_2_supp_3348977_p2phcx.xlsx [file 10780432ccr151983-sup-154192_2_supp_3348977_p2phcx.xlsx]

## Sheet: Sheet1
ABHD8
ACTR1B
ADIPOR2
ADRA2A
AFMID
ANAPC5
ANKRD13A
APOD
ARL6IP5
ATPIF1
AUH
B2M
BBS1
BIRC5
C14orf167
C1orf203
C20orf117
C8orf55
C9orf5
CACNB3
CAMK2B
CAPNS1
CASP4
CBX7
CCND3
CD47
CDC42SE2
CEL
CETN2
CHES1
CLDN23
CLDND2
CLGN
CMIP
CNOT6
CREB3L2
CTSB
CXCR7
D2HGDH
DHX40
DIRC2
DLST
EIF2AK1
EIF2S3
ELL3
ELOVL6
FAM127B
FAM65A
FAM82A2
FBXO21
FGFRL1
FKBP1A
FKBP9L
FLOT2
FRAG1
FYCO1
GLIPR2
GPD1L
GSTT1
HIST2H2BE
HLA-DMA
HLA-DMB
HLA-E
HMGN4
HSD3B7
IFITM2
IFITM3
IL32
ITM2C
ITPK1
ITPR3
KLF9
KLHDC9
KLHL12
KLHL35
KLHL5
LAD1
LAMB2
LARP6
LGALS3BP
LOC148430
LOC642489
LOC645175
LOC728556
LPP
LRP11
LRP8
LRRC16
LYRM7
MAL2
MB
MBNL1
MEA1
MERTK
MGRN1
MRPL34
MRPL36
MRPS27
MRRF
MT1F
MYD88
NDUFA10
NDUFA6
NFATC2IP
NICN1
NIPA2
NUDT21
PAIP2
PANX2
PAQR4
PARP12
PARP9
PFTK1
PGM2
PIK3IP1
PJA2
PLDN
POGK
PPP1CB
PRELID1
PRKRA
PRMT6
RAB8B
RASEF
RBL2
REPS2
RETSAT
RFX5
RFX7
RGS11
RHOQ
RLN1
RLN2
RNF114
RNF149
RNF38
RRAGA
SCMH1
SEMA4A
SEMA6A
SEPN1
SERP1
SFXN2
SH3D19
SIGMAR1
SLC25A22
SLC30A1
SLC39A3
SMAD6
STMN3
STT3A
SUOX
SUPT16H
SUPT4H1
SYPL1
TACC1
TBL1X
TBL1XR1
TCFL5
TINF2
TMEM106B
TMEM109
TMEM19
TMSB4X
TNFAIP1
TRAK2
TSC2
TUBG1
UBE2D4
VAMP7
VCL
VIM
VPS25
WASF3
WDR40A
YES1
YIPF6
ZC4H2
ZDHHC16
ZMAT3
ZNF362
