# Supplementary material for: Nuclear Receptor Corepressor 1 Expression and Output Declines with Prostate Cancer Progression
Source: Oxford University Press journal article supplement (doi:10.1158/1078-0432.ccr-15-1983), 2016-03-11
Supplement: 10780432ccr151983-sup-154192_2_supp_3348979_j2jhcx.xlsx [file 10780432ccr151983-sup-154192_2_supp_3348979_j2jhcx.xlsx]

## Sheet: sig_siNCOR.over.Veh
Gene	log2 fold change (siNCOR1/Veh)
NCOR1	-2.151
UGT2B15	-1.089
UGT2B17	-0.917
C5orf13	-0.819
NUPL1	-0.747
MCCC2	-0.692
MTMR9	-0.683
HMGCS2	-0.627
SH3BP2	-0.509
RIT1	-0.507
STX3	-0.504
ARL2BP	-0.496
KLHL28	-0.491
PRKAA1	-0.486
MRS2	-0.461
ST3GAL1	-0.457
ASPH	-0.452
LAMA3	-0.433
TMPRSS2	-0.432
C9orf41	-0.414
MTFR1	-0.409
TNRC6B	-0.406
C8orf44	-0.4
NCAM2	-0.392
SERINC3	-0.39
HNRNPH1	-0.378
CALD1	-0.378
CCDC141	-0.374
PTP4A2	-0.374
PPP3CB	-0.37
PRKACB	-0.369
ZMAT5	-0.369
ITSN1	-0.368
BRWD1	-0.366
EEF2K	-0.363
PRMT2	-0.362
RPL38	-0.361
ACADSB	-0.36
ATPAF1	-0.357
SLC10A7	-0.352
FBXL20	-0.351
RNF168	-0.351
GJD3	-0.348
ENPP5	-0.338
QSER1	-0.336
DNAJC21	-0.335
OSTM1	-0.334
SKAP2	-0.332
PPM1H	-0.328
DBT	-0.328
LOC100507620	-0.324
SSX3	-0.322
PACSIN2	0.322
CCDC123	0.323
SMAD2	0.324
HNRNPUL1	0.324
BRDT	0.326
DEF8	0.326
PRIM2	0.326
IVNS1ABP	0.326
GDPD1	0.328
TK2	0.328
CHST8	0.329
GUSBP1	0.329
WDR6	0.329
CROT	0.33
ADNP2	0.331
IQCB1	0.332
TMEM184B	0.332
EFNA3	0.332
RPL35A	0.333
GRB10	0.333
TJP3	0.333
C4orf46	0.334
NDN	0.335
CSTF3	0.336
EFNA5	0.336
PARD6G	0.337
COL6A1	0.337
CBFA2T3	0.338
C1orf85	0.338
GM2A	0.338
GALM	0.339
GSTM3	0.339
VRTN	0.34
LOC100507303	0.34
ABCA7	0.34
MSX1	0.341
CHPT1	0.342
SOX8	0.342
GDF11	0.343
DDC	0.343
ATP5L	0.343
RGS10	0.343
ZBED3	0.344
BMPR2	0.344
CLIC4	0.344
HS6ST1	0.345
RSL1D1	0.346
RHOF	0.346
LOC100506553	0.346
SH3RF1	0.346
NANP	0.348
TTC3	0.348
HEY1	0.349
PDS5B	0.349
CIZ1	0.349
KIF22	0.35
HNRNPA0	0.35
APLP1	0.351
ICMT	0.351
TOB2	0.351
LOC283788	0.352
C7orf13	0.352
IFT140	0.352
RAB2A	0.352
SLC25A37	0.353
LOC100128439	0.353
TACC2	0.356
IGFBP2	0.357
RHOU	0.359
NT5DC2	0.359
VCY	0.359
TBC1D8	0.36
METT10D	0.362
TMEM135	0.363
IL21R	0.363
MEX3D	0.363
CAND1	0.364
BAT2L2	0.366
FAM47B	0.37
ABCG1	0.37
MED28	0.371
ZDHHC20	0.372
STAT3	0.374
STEAP3	0.374
NCRNA00219	0.375
ZFHX3	0.377
FAM171A1	0.378
USP38	0.379
PTCH1	0.38
C22orf43	0.384
SFI1	0.385
LSM7	0.385
RTF1	0.385
RGMB	0.386
DDT	0.387
BAT2L1	0.387
BARD1	0.388
MFSD3	0.389
ZBED4	0.39
C17orf69	0.391
TSPYL4	0.394
FBXO44	0.394
SMAD6	0.396
RALGDS	0.4
C11orf24	0.4
PCDH11Y	0.401
LOC388692	0.401
RCAN3	0.404
STK35	0.404
TMEM41A	0.407
C14orf143	0.408
NRP1	0.408
KIAA1737	0.41
POLD3	0.41
NDUFA10	0.411
MALAT1	0.411
TUB	0.411
FBXL17	0.412
C6orf120	0.413
SCD	0.415
PPP2R3A	0.419
PML	0.42
DUXAP10	0.425
ILF3	0.433
FOXO3	0.434
CSNK1E	0.436
C9orf46	0.436
GPER	0.436
LMNB2	0.436
NOTCH2NL	0.437
LPCAT3	0.437
LTBP3	0.437
RAB27A	0.438
QKI	0.438
CALML4	0.439
FN1	0.44
SBNO1	0.44
ZC3HAV1	0.442
THOC4	0.443
KLF10	0.447
LAMC1	0.449
DSEL	0.453
LOC727820	0.453
TMEM50B	0.457
POLR3E	0.461
SLC41A1	0.464
SLC7A2	0.466
DNMT1	0.469
ZNF680	0.474
PCNT	0.48
LAMP2	0.486
SAR1B	0.487
HMGN4	0.498
FLJ39632	0.498
TNRC6A	0.508
TMEM48	0.509
LOC100272216	0.51
LOC728855	0.514
ATMIN	0.521
ZNF827	0.523
LOC284801	0.525
GNB1	0.531
SCAMP1	0.537
YWHAH	0.542
SLC7A11	0.543
TOP1MT	0.56
USP43	0.563
NUDT15	0.568
ASS1	0.57
EIF2C4	0.572
MYO19	0.574
SYT4	0.579
THUMPD1	0.594
SEC24A	0.612
LSM14A	0.616
SLC4A4	0.62
LOC100499177	0.622
SREBF1	0.627
IL6ST	0.642
FAM110B	0.646
JDP2	0.65
SEPP1	0.664
EMP2	0.665
SNHG9	0.731
KLHL1	0.796
C1orf58	0.797
ALCAM	0.8
AIDA	0.865
C15orf21	0.878
HIPK3	0.926
BTG1	0.992
SEMA3C	1.194
S1PR3	1.269
CBLN2	1.351
CAMK2N1	1.563
