# Supplementary material for: Nuclear Receptor Corepressor 1 Expression and Output Declines with Prostate Cancer Progression
Source: Oxford University Press journal article supplement (doi:10.1158/1078-0432.ccr-15-1983), 2016-03-11
Supplement: 10780432ccr151983-sup-154192_2_supp_3348980_929hcx.xlsx [file 10780432ccr151983-sup-154192_2_supp_3348980_929hcx.xlsx]

## Sheet: page 1
Grasso
	sig_Hieronymus	NCOR1	NCOR2	sig_Nelson
sig_Hieronymus	1	NS	NS	0.866264
NCOR1	NS	NS	NS	NS
NCOR2	NS	NS	1	-0.269206
sig_Nelson	0.866264	NS	-0.269206	1
Grasso CRPC
	sig_Hieronymus	NCOR1	NCOR2	sig_Nelson
sig_Hieronymus	1	NS	NS	0.769837
NCOR1	NS	1	NS	NS
NCOR2	NS	NS	1	-0.352543
sig_Nelson	0.769837	NS	-0.352543	1
Cai and Stanbrough
	sig_Hieronymus	NCOR1	NCOR2	sig_Nelson
sig_Hieronymus	1	NS	NS	0.961263
NCOR1	NS	1	NS	NS
NCOR2	NS	NS	1	NS
sig_Nelson	0.961263	NS	NS	1
Cai and Stanbrough Met
	sig_Hieronymus	NCOR1	NCOR2	sig_Nelson
sig_Hieronymus	1	NS	NS	0.933478
NCOR1	NS	1	NS	NS
NCOR2	NS	NS	1	NS
sig_Nelson	0.933478	NS	NS	1
Taylor
	sig_Hieronymus	NCOR1	NCOR2	sig_Nelson
sig_Hieronymus	1	0.28645	0.184455	0.79485
NCOR1	0.28645	1	NS	0.279794
NCOR2	0.184455	NS	1	NS
sig_Nelson	0.79485	0.279794	NS	1
